# Supplementary material for: Cardiolipin content controls mitochondrial coupling and energetic efficiency in muscle
Source: PubMed Central journal article supplement — Sci Adv. 2021 Jan 1;7(1):eabd6322. doi: 10.1126/sciadv.abd6322 (PMC7775760; doi:10.1126/sciadv.abd6322), 2021-01-01
Supplement: abd6322_SM.pdf [file abd6322_SM.pdf]

## Supplementary Materials for

### **Cardiolipin content controls mitochondrial coupling and energetic efficiency in muscle**

Alexandre Prola, Jordan Blondelle, Aymeline Vandestienne, Jérôme Piquereau, Raphaël G. P. Denis, Stéphane Guyot, Hadrien Chauvin, Arnaud Mourier, Marie Maurer, Céline Henry, Nahed Khadhraoui, Cindy Gallerne, Thibaut Molinié, Guillaume Courtin, Laurent Guillaud, Mélanie Gressette, Audrey Solgadi, Florent Dumont, Julien Castel, Julien Ternacle, Jean Demarquoy, Alexandra Malgoyre, Nathalie Koulmann, Geneviève Derumeaux, Marie-France Giraud, Frédéric Joubert, Vladimir Veksler, Serge Luquet, Frédéric Relaix\*, Laurent Tiret\*, Fanny Pilot-Storck\*

\*Corresponding author. Email: [fanny.storck@vet-alfort.fr](mailto:fanny.storck@vet-alfort.fr) (F.P.-S.); [laurent.tiret@vet-alfort.fr](mailto:laurent.tiret@vet-alfort.fr) (L.T.); [frederic.relaix@inserm.fr](mailto:frederic.relaix@inserm.fr) (F.R.)

Published 1 January 2021, *Sci. Adv.* 7, eabd6322 (2021)  
DOI: 10.1126/sciadv.abd6322

#### **The PDF file includes:**

Tables S1 to S7  
Supplementary Listing S1  
Figs. S1 to S6

#### **Other Supplementary Material for this manuscript includes the following:**

(available at [advances.sciencemag.org/cgi/content/full/7/1/eabd6322/DC1](https://advances.sciencemag.org/cgi/content/full/7/1/eabd6322/DC1))

Table S3

**Table S1: Anatomical parameters of WT and *Hacd1*-KO mice after normal or high fat diet.**  
Related to Figures 1 and S1.

|                              | WT ND         | <i>Hacd1</i> -KO ND   | WT HFD                     | <i>Hacd1</i> -KO HFD          |
|------------------------------|---------------|-----------------------|----------------------------|-------------------------------|
| Eviscerated BW (g)           | 29.9 ± 1.4    | 26.3 ± 1.5            | 33.1 ± 2.1                 | <b>25.8 ± 1.3 *</b>           |
| Initial BW (g)               | 29.3 ± 0.9    | <b>26.3 ± 0.5 **</b>  | 29.6 ± 0.6                 | <b>25.4 ± 0.7 ***</b>         |
| Final BW (g)                 | 32.4 ± 1.2    | <b>28.8 ± 0.4 **</b>  | <b>44.2 ± 1.3 \$\$\$</b>   | <b>31.4 ± 1.4 ***</b>         |
| BW gain (g)                  | 3.1 ± 0.6     | 2.5 ± 0.3             | <b>14.6 ± 1.0 \$\$\$</b>   | <b>6.3 ± 1.0 ***\$</b>        |
| BW gain (%)                  | 10.4 ± 1.8    | 9.7 ± 1.1             | <b>49.5 ± 3.2 \$\$\$</b>   | <b>25.3 ± 3.9 ***\$\$</b>     |
| Tibial length (cm)           | 1.78 ± 0.03   | 1.80 ± 0.04           | 1.74 ± 0.02                | 1.74 ± 0.02                   |
| Heart weight (mg)            | 130.3 ± 4.9   | 120.1 ± 3.6           | <b>153.7 ± 7.6 \$</b>      | <b>130.7 ± 13.5 **</b>        |
| Lung weight (mg)             | 185.8 ± 16.4  | 164.9 ± 11.6          | 273.3 ± 27.9               | 221.2 ± 9.9                   |
| Liver weight (mg)            | 1633.7 ± 85.1 | 1309.6 ± 39.0         | 1698.5 ± 118.2             | <b>1132.7 ± 103.1 \$</b>      |
| Kidney weight (mg)           | 214.9 ± 11.2  | 185.9 ± 7.2           | 203.8 ± 5.8                | 205.2 ± 3.9                   |
| <i>Tibial anterior</i> (mg)  | 46.1 ± 1.3    | <b>37.5 ± 0.9 **</b>  | 47.9 ± 1.8                 | <b>40.8 ± 1.3 ***</b>         |
| Gonadal fat pad (mg)         | 416 ± 82      | 279 ± 90              | <b>2182 ± 244 \$\$\$</b>   | <b>1079 ± 244 **\$</b>        |
| Retroperitoneal fat pad (mg) | 157.2 ± 47.3  | 94.3 ± 16.5           | <b>927.8 ± 83.0 \$\$\$</b> | <b>353.3 ± 91.2 ***</b>       |
| Mesenteric fat pad (mg)      | 567.2 ± 27.5  | 504.0 ± 42.9          | <b>942.7 ± 121.2 \$\$</b>  | <b>452.0 ± 102.7 **</b>       |
| BAT weight (mg)              | 133.9 ± 16.9  | <b>79.3 ± 5.8 **</b>  | <b>283.2 ± 26.2 \$\$\$</b> | <b>174.1 ± 26.9 \$\$\$**</b>  |
| HW/BW                        | 4.21 ± 0.11   | <b>4.83 ± 0.14 *</b>  | <b>3.52 ± 0.15 \$</b>      | <b>3.96 ± 0.22 \$\$</b>       |
| Lung /BW                     | 5.98 ± 0.44   | 6.61 ± 0.43           | 6.24 ± 0.49                | 6.66 ± 0.27                   |
| Liver/BW                     | 52.63 ± 1.39  | 52.53 ± 0.82          | <b>38.57 ± 2.06 \$</b>     | <b>33.45 ± 1.76 \$</b>        |
| Kidney/BW                    | 6.92 ± 0.13   | 7.46 ± 0.26           | <b>4.70 ± 0.21 \$</b>      | 6.24 ± 0.33                   |
| TA/BW                        | 1.75 ± 0.03   | <b>1.52 ± 0.04 **</b> | <b>1.11 ± 0.02 \$\$\$</b>  | <b>1.23 ± 0.00 \$\$\$</b>     |
| Gonadal fat pad/BW           | 11.85 ± 2.03  | 9.13 ± 0.72           | <b>53.31 ± 5.04 \$\$\$</b> | <b>34.26 ± 5.87 *\$</b>       |
| Retroperitoneal fat pad/BW   | 4.44 ± 1.23   | 3.01 ± 0.37           | 22.81 ± 1.34 \$\$\$        | <b>11.13 ± 2.31 ***\$\$\$</b> |
| Mesenteric fat pad/BW        | 16.37 ± 0.59  | 16.27 ± 0.37          | <b>23.13 ± 1.94 \$</b>     | <b>14.31 ± 2.35 *</b>         |
| BAT/BW                       | 4.25 ± 0.40   | <b>3.18 ± 0.21 *</b>  | <b>6.43 ± 0.50 \$\$</b>    | <b>5.05 ± 0.57 \$\$*</b>      |

**Table S2: Echocardiographic parameters of WT and *Hacd1*-KO mice.**  
 Related to Figures 2 and S2.

|                                  | <b>WT</b>    | <b><i>Hacd1</i>-KO</b> |
|----------------------------------|--------------|------------------------|
| <b>EF(%)</b>                     | 81.2 ± 2.3   | 83 ± 2.2               |
| <b>FS (%)</b>                    | 44.8 ± 2.5   | 46.7 ± 2.7             |
| <b>HR (bpm)</b>                  | 631 ± 9      | 624 ± 17               |
| <b>LVd (mm)</b>                  | 2.73 ± 0.11  | 2.88 ± 0.05            |
| <b>LVs (mm)</b>                  | 1.51 ± 0.10  | 1.54 ± 0.10            |
| <b>IVSd (mm)</b>                 | 0.83 ± 0.04  | 0.78 ± 0.03            |
| <b>IVSs (mm)</b>                 | 1.43 ± 0.05  | 1.44 ± 0.05            |
| <b>PWd (mm)</b>                  | 0.82 ± 0.03  | 0.80 ± 0.04            |
| <b>PWs (mm)</b>                  | 1.36 ± 0.07  | 1.48 ± 0.05            |
| <b>Strain rate ant (unit/s)</b>  | 25.64 ± 1.40 | 23.25 ± 1.33           |
| <b>Strain rate post (unit/s)</b> | 25.91 ± 1.60 | 23.75 ± 1.08           |

**Table S3: Proteomic dataset and Panther analysis.**  
Related to Figure S2.

See Table S3 Excel File .

**Table S4: Mitochondrial respiration rates.**  
Related to Figures 3 and S3.

**Mitochondrial respiration rates for different complexes in WT or *Hacd1*-KO mice superficial *gastrocnemius* and *soleus* permeabilized muscle fibers.**

|                           | <b>WT <i>Gast.</i> (6)</b>  | <b><i>Hacd1</i>-KO <i>Gast.</i> (6)</b>  | <b><i>P</i></b>  |
|---------------------------|-----------------------------|------------------------------------------|------------------|
| <b>Vo</b>                 | 2.16 ± 0.29                 | 4.10 ± 0.45                              | <b>0.003</b>     |
| <b>Complex I</b>          | 11.06 ± 0.89                | 9.37 ± 1.03                              | 0.235            |
| <b>Complex I+II</b>       | 16.11 ± 1.56                | 12.26 ± 1.42                             | 0.089            |
| <b>Complex II</b>         | 5.71 ± 0.54                 | 3.45 ± 0.44                              | <b>0.006</b>     |
| <b>Ratio CxII/CxI</b>     | 0.52 ± 0.04                 | 0.37 ± 0.05                              | <b>0.020</b>     |
| <b>ACR (Complex I/Vo)</b> | 5.73 ± 0.94                 | 2.71 ± 0.68                              | <b>0.007</b>     |
|                           | <b>WT <i>Soleus</i> (6)</b> | <b><i>Hacd1</i>-KO <i>Soleus</i> (6)</b> | <b><i>P</i></b>  |
| <b>Vo</b>                 | 4.21 ± 0.49                 | 7.92 ± 0.55                              | <b>&lt;0.001</b> |
| <b>Complex I</b>          | 19.72 ± 2.31                | 16.05 ± 1.39                             | 0.263            |
| <b>Complex I+II</b>       | 25.07 ± 2.78                | 23.46 ± 2.28                             | 0.652            |
| <b>Complex II</b>         | 13.78 ± 2.93                | 15.37 ± 1.62                             | 0.534            |
| <b>Ratio CxII/CxI</b>     | 0.68 ± 0.03                 | 0.67 ± 0.05                              | 0.878            |
| <b>ACR (Complex I/Vo)</b> | 4.83 ± 0.35                 | 3.05 ± 0.28                              | <b>&lt;0.001</b> |
|                           | <b>WT <i>Heart</i> (4)</b>  | <b><i>Hacd1</i>-KO <i>Heart</i> (4)</b>  | <b><i>P</i></b>  |
| <b>Vo</b>                 | 5.40 ± 0.30                 | 5.62 ± 0.32                              | 0.611            |
| <b>Complex I</b>          | 27.25 ± 1.28                | 29.67 ± 1.83                             | 0.299            |
| <b>Complex I+II</b>       | 37.34 ± 2.76                | 44.59 ± 3.80                             | 0.207            |
| <b>ACR (Complex I/Vo)</b> | 5.22 ± 0.42                 | 5.39 ± 0.38                              | 0.782            |

**Mitochondrial substrate utilization in WT or *Hacd1*-KO mice superficial *gastrocnemius* and *soleus* permeabilized muscle fibers.**

|                              | <b>WT <i>Gast.</i> (6)</b>  | <b><i>Hacd1</i>-KO <i>Gast.</i> (6)</b>  | <b><i>P</i></b>  |
|------------------------------|-----------------------------|------------------------------------------|------------------|
| <b>Vo</b>                    | 0.97 ± 0.16                 | 2.07 ± 0.14                              | <b>&lt;0.001</b> |
| <b>Palmitoyl-CoA</b>         | 2.27 ± 0.30                 | 3.06 ± 0.35                              | <b>0.043</b>     |
| <b>+ octanoate</b>           | 2.29 ± 0.36                 | 3.10 ± 0.30                              | <b>0.026</b>     |
| <b>+ pyruvate</b>            | 7.37 ± 0.52                 | 7.49 ± 0.36                              | 0.851            |
| <b>+ Glutamate/Succinate</b> | 10.27 ± 0.98                | 11.18 ± 0.62                             | 0.425            |
| <b>ACR (PCoA/Vo)</b>         | 3.07 ± 0.61                 | 1.52 ± 0.16                              | <b>0.003</b>     |
| <b>% fatty acids</b>         | 27.33 ± 4.81                | 28.33 ± 2.47                             | 0.845            |
| <b>% pyruvate</b>            | 59.03 ± 5.06                | 67.90 ± 2.67                             | 0.112            |
| <b>% PCoA/Octanoate</b>      | 97.52 ± 6.21                | 97.71 ± 1.76                             | 0.975            |
|                              | <b>WT <i>Soleus</i> (6)</b> | <b><i>Hacd1</i>-KO <i>Soleus</i> (6)</b> | <b><i>P</i></b>  |
| <b>Vo</b>                    | 3.32 ± 0.81                 | 6.04 ± 0.50                              | <b>&lt;0.001</b> |
| <b>Palmitoyl-CoA</b>         | 12.83 ± 1.13                | 15.79 ± 1.03                             | <b>0.049</b>     |
| <b>+ octanoate</b>           | 14.65 ± 0.75                | 17.89 ± 0.89                             | <b>0.011</b>     |
| <b>+ pyruvate</b>            | 18.88 ± 1.17                | 20.44 ± 1.82                             | 0.583            |
| <b>+ Glutamate/Succinate</b> | 24.14 ± 1.54                | 25.14 ± 1.90                             | 0.931            |
| <b>ACR (PCoA/Vo)</b>         | 3.85 ± 0.22                 | 2.77 ± 0.26                              | <b>0.004</b>     |
| <b>% fatty acids</b>         | 61.96 ± 3.50                | 72.69 ± 2.76                             | <b>0.025</b>     |
| <b>% pyruvate</b>            | 78.48 ± 2.14                | 81.01 ± 2.12                             | 0.583            |
| <b>% PCoA/Octanoate</b>      | 86.03 ± 4.72                | 89.22 ± 5.93                             | 0.678            |

**Mitochondrial respiration rates in isolated mitochondria from WT or *Hacd1*-KO mice TA.**

|                                                 | <b>WT (4)</b>  | <b><i>Hacd1</i>-KO (4)</b> | <b><i>P</i></b> |
|-------------------------------------------------|----------------|----------------------------|-----------------|
| <b>Phosphorylating (State 3)</b>                | 101.55 ± 19.72 | 48.03 ± 7.20               | <b>0.044</b>    |
| <b>State 4</b>                                  | 10.90 ± 0.87   | 12.75 ± 2.01               | 0.432           |
| <b>RCR</b>                                      | 9.14 ± 1.24    | 3.12 ± 0.48                | <b>0.004</b>    |
| <b>Non-phosphorylating</b>                      | 14.34 ± 1.70   | 11.25 ± 1.04               | 0.172           |
| <b>Uncoupled</b>                                | 189.42 ± 16.95 | 160.78 ± 16.48             | 0.153           |
| <b>Cyt-C stimulation (%)</b>                    | 7.80 ± 3.80    | 8.57 ± 3.98                | 0.667           |
| <b>VO<sub>2</sub> (for ATP/O determination)</b> | 129.87 ± 6.80  | 96.62 ± 10.57              | <b>0.038</b>    |
| <b>ATP production (for ATP/O determination)</b> | 2.02 ± 0.24    | 0.89 ± 0.22                | <b>0.011</b>    |

**Table S5: Non-linear mixed-effects models of the fluorescence decay of TMA-DPH.**  
 Related to Figure S6.

**Non-linear mixed-effects models of the fluorescence decay from the analyses of mtIM.**

|                     | <i>Dependent variable:</i>             |                   |                   |                    |
|---------------------|----------------------------------------|-------------------|-------------------|--------------------|
|                     | Experimental response (event count/ns) |                   |                   |                    |
|                     | <b>A</b>                               | <b>B1</b>         | <b>B2</b>         | <b>C</b>           |
| $\theta_1$          | 0.455*** (0.153)                       | 0.505*** (0.153)  |                   |                    |
| $B_1$               | 0.025*** (0.001)                       |                   | 0.025*** (0.001)  |                    |
| $\theta_2$          | -2.852*** (0.242)                      | -2.631*** (0.257) |                   |                    |
| $B_2$               | 0.0002* (0.0001)                       |                   | 0.0001* (0.0001)  |                    |
| $\theta_3$          | -0.697*** (0.087)                      | -0.667*** (0.094) |                   |                    |
| $B_3$               | 0.016*** (0.001)                       |                   | 0.016*** (0.001)  |                    |
| $B_1$ (inter.)      |                                        | 0.029*** (0.002)  |                   | 0.029*** (0.002)   |
| $B_1$ (WT)          |                                        | -0.007*** (0.002) |                   | -0.007*** (0.002)  |
| $B_2$ (inter.)      |                                        | 0.001*** (0.0002) |                   | 0.0005*** (0.0002) |
| $B_2$ (WT)          |                                        | -0.0004 (0.0003)  |                   | -0.0004 (0.0003)   |
| $B_3$ (inter.)      |                                        | 0.018*** (0.001)  |                   | 0.018*** (0.001)   |
| $B_3$ (WT)          |                                        | -0.002 (0.002)    |                   | -0.002 (0.002)     |
| $\theta_1$ (inter.) |                                        |                   | 0.752*** (0.160)  | 0.846*** (0.172)   |
| $\theta_1$ (WT)     |                                        |                   | -0.647*** (0.226) | -0.708*** (0.243)  |
| $\theta_2$ (inter.) |                                        |                   | -2.629*** (0.316) | -2.432*** (0.336)  |
| $\theta_2$ (WT)     |                                        |                   | -0.509 (0.448)    | -0.549 (0.476)     |
| $\theta_3$ (inter.) |                                        |                   | -0.727*** (0.121) | -0.692*** (0.126)  |
| $\theta_3$ (WT)     |                                        |                   | 0.040 (0.171)     | 0.028 (0.178)      |
| Obs.                | 57,344                                 | 57,344            | 57,344            | 57,344             |
| Log Likelihood      | -136,223.600                           | -136,134.000      | -136,268.900      | -136,157.800       |
| Akaike Inf. Crit.   | 272,475.300                            | 272,301.900       | 272,571.900       | 272,355.600        |
| Bayesian Inf. Crit. | 272,600.700                            | 272,454.200       | 272,724.100       | 272,534.800        |

**Table S6: Sequence of qPCR primers used in this study.**  
Related to Materials and methods.

| <b>Gene</b>     | <b>Forward primer</b>   | <b>Reverse primer</b>   |
|-----------------|-------------------------|-------------------------|
| <i>Acadm</i>    | CCGTTCCCTCTCATCAAAG     | ACACCCATACGCCAACTCTT    |
| <i>Acadvl</i>   | TGGGCCTCTCTAATACCCAGT   | TCCCAGGGTAACGCTAACAC    |
| <i>Cd36</i>     | CCACTGTGTACAGACAGTTTTGG | GCTCAAAGATGGCTCCATTG    |
| <i>Catalase</i> | CCTCGTTCAGGATGTGGTTT    | TCTGGTGATATCGTGGGTGA    |
| <i>Coxl</i>     | CACTAATAATCGGAGCCCCA    | TTCATCCTGTTCTGCTCCT     |
| <i>Cpt1</i>     | TCACCTGGGCTACACGGAGA    | TCGGGGCTGGTCTACACTT     |
| <i>Cpt2</i>     | ACCTGCTCGCTCAGGATAAA    | AAACGACAGAGTCTCGAGCAG   |
| <i>Fas</i>      | GCAAGTGCAGCCTGAGGGAC    | ACAGCCTGGGGTCATCTTTGC   |
| <i>Gpx1</i>     | GTTTCCCGTGCAATCAGTTC    | TCACTTCGCACTTCTCAAACA   |
| <i>Hadha</i>    | GCTTGGGAGGAGGACTTGA     | AGCAACACTTCAGGGACACC    |
| <i>Nrf1</i>     | TTACTCTGCTGTGGCTGATGG   | CCTCTGATGCTTGCCTGCTCT   |
| <i>Pex11a</i>   | TCAAGAGGCTGGAGACCAGT    | CGGTTGAGGTTGGCTAATGT    |
| <i>Pex19</i>    | TGTACCCATCCCTGAAGGAG    | TGTGCTGCTGCTGGTACTTC    |
| <i>Polr2a</i>   | CAACATGCTGACAGATATGACC  | TGATGATCTTCTTCTTGTGTCTG |
| <i>Ppara</i>    | AAGTGCCTGTCTGTCTGGGAT   | GCTTCGTGGATTCTCTTGCC    |
| <i>Ppard</i>    | GGGACCAGAACACACGCTT     | CCGCACACCCGACATTCCAT    |
| <i>Ppargc1a</i> | CACCAAACCCACAGAGAACAG   | GCAGTTCCAGAGAGTTCCACA   |
| <i>Ppargc1b</i> | TGGAAAGCCCTGTGAGAGT     | TTGTATGGAGGTGTGGTGGG    |
| <i>Rpl32</i>    | GCTGCTGATGTGCAACAAA     | GGGATTGGTACTCTGATGG     |
| <i>Rplpo</i>    | GCGACCTGGAAGTCCAATA     | TTGTCTGCTCCCACAATGAA    |
| <i>Sod2</i>     | AGGAGCAAGGTCGCTTACAG    | GTAGTAAGCGTGCTCCCACA    |
| <i>Scd1</i>     | CTACATGACCAGCGCTCTG     | CGTACACGTCATTCTGGAACG   |
| <i>Scd2</i>     | GTAATCAGCGCCCTGGGCAT    | CATACACGTCATTCTGGAACGC  |
| <i>Srebp-1c</i> | CTGGAGACATCGCAAACAAGCTG | TGAGGTTCCAAAGCAGACTGCAG |
| <i>Tfam</i>     | GCTGATGGGTATGGAGAAG     | GAGCCGAATCATCCTTTGC     |
| <i>Ucp1</i>     | AGGGAGAGAAACACCTGCC     | GCATTCTGACCTTACGACC     |
| <i>Ucp2</i>     | CAGATGTGGTAAAGTCCGC     | CAGAAGTGAAGTGGCAAGGG    |
| <i>Ucp3</i>     | ATGGTTGGACTTCAGCCCTC    | TGGGGGTGTAGAACTGCTTG    |

**Table S7: Key resources table.**  
Related to Materials and methods.

| REAGENT or RESOURCE                                                                          | SOURCE                   | IDENTIFIER |
|----------------------------------------------------------------------------------------------|--------------------------|------------|
| <b>Antibodies</b>                                                                            |                          |            |
| Rabbit anti-AMPK                                                                             | Cell signaling           | 2532       |
| Rabbit anti-phospho-AMPK                                                                     | Cell signaling           | 2535       |
| Rabbit anti-Citrate Synthase                                                                 | Cell signaling           | 14309      |
| Rabbit anti-UCP3                                                                             | Abcam                    | ab10985    |
| Mouse anti-ATP5A                                                                             | Abcam                    | ab110413   |
| Rabbit anti-VDAC                                                                             | Custom                   | N/A        |
| Mouse anti- $\beta$ -actin                                                                   | Santa Cruz               | 47778      |
| <b>Chemicals, Peptides, and Recombinant Proteins</b>                                         |                          |            |
| Sodium pyruvate                                                                              | Sigma                    | P2256      |
| Palmitoyl coenzyme A lithium salt                                                            | Sigma                    | P9716      |
| L-Carnitine inner salt                                                                       | Sigma                    | C0158      |
| L-Glutamic acid potassium salt monohydrate                                                   | Sigma                    | G1501      |
| L-(-)-Malic acid                                                                             | Sigma                    | M6413      |
| Sodium succinate dibasic                                                                     | Sigma                    | 14160      |
| Adenosine 5'-diphosphate monopotassium salt dihydrate                                        | Sigma                    | A5285      |
| Adenosine 5'-triphosphate disodium salt hydrate                                              | Sigma                    | A3377      |
| $\beta$ -Nicotinamide adenine dinucleotide, reduced disodium salt hydrate                    | Sigma                    | N8129      |
| Carbonyl cyanide 4-(trifluoromethoxy)phenylhydrazone (FCCP)                                  | Sigma                    | C2910      |
| N,N,N',N'-Tetramethyl-p-phenylenediamine dihydrochloride                                     | Sigma                    | T3134      |
| (+)-Sodium L-ascorbate                                                                       | Sigma                    | A7631      |
| Magnesium chloride solution                                                                  | Sigma                    | 63069      |
| Sodium azide                                                                                 | Sigma                    | S2002      |
| Cytochrome c from equine heart                                                               | Sigma                    | C2506      |
| Oligomycin from Streptomyces diastatochromogenes                                             | Sigma                    | O4876      |
| Digitonin                                                                                    | Sigma                    | D141       |
| Saponin                                                                                      | Sigma                    | 84510      |
| Acetyl coenzyme A lithium salt                                                               | Sigma                    | A2181      |
| Oxaloacetic acid                                                                             | Sigma                    | O4126      |
| 5,5'-Dithiobis(2-nitrobenzoic acid)                                                          | Sigma                    | D8130      |
| Trizma® base                                                                                 | Sigma                    | T1503      |
| Potassium hexacyanoferrate(III)                                                              | Sigma                    | P3667      |
| Bovine Serum Albumin                                                                         | Sigma                    | A7030      |
| D-(+)-Glucose                                                                                | Sigma                    | G7021      |
| Sodium dithionite                                                                            | Sigma                    | 1.06507    |
| Dibasic potassium phosphate                                                                  | Sigma                    | 1551128    |
| Potassium phosphate monobasic                                                                | Sigma                    | P5655      |
| Sodium bicarbonate                                                                           | Sigma                    | S5761      |
| TRI Reagent®                                                                                 | Sigma                    | T9424      |
| Nitrotetrazolium Blue chloride                                                               | Sigma                    | N6876      |
| Menadione                                                                                    | Sigma                    | M5625      |
| rac-Glycerol 1-phosphate disodium salt hydrate                                               | Sigma                    | G2138      |
| Glycerol                                                                                     | Sigma                    | G7757      |
| Calcium chloride dihydrate                                                                   | Sigma                    | C3881      |
| Hepes sodium salt                                                                            | Sigma                    | H7006      |
| MOPS                                                                                         | Sigma                    | M1254      |
| Ethylene glycol-bis(2-aminoethylether)-N,N,N',N'-tetraacetic acid                            | Sigma                    | 03777      |
| Hematoxylin Solution, Mayer's                                                                | Millipore                | 109249     |
| Oil Red O                                                                                    | Sigma                    | O0625      |
| Bolt™ 4-12% Bis-Tris Plus Gels, 17-well                                                      | Thermo Fisher Scientific | NW04127BOX |
| TMA-DPH (N,N,N-Trimethyl-4-(6-phenyl-1,3,5-hexatrien-1-yl)phenylammonium p-toluenesulfonate) | Sigma                    | T0775      |
| cis-Aconitic acid                                                                            | Sigma                    | A3412      |
| Triton™ X-100                                                                                | Sigma                    | T9284      |
| Sodium pyrophosphate dibasic                                                                 | Sigma                    | P8135      |
| Acetoacetyl coenzyme A sodium salt hydrate                                                   | Sigma                    | A1625      |
| Fluorescent mounting medium containing chromatin stain DAPI                                  | Vectashield®             | H-1200     |
| Sodium cyanide                                                                               | Sigma                    | 431591     |
| Rhodamine 123                                                                                | Sigma                    | R8004      |



|                                                                             |                                          |                                               |
|-----------------------------------------------------------------------------|------------------------------------------|-----------------------------------------------|
| Perchloric acid                                                             | Sigma                                    | 311421                                        |
| Cardiolipin from bovine heart                                               | Sigma                                    | C0563                                         |
| TopFluor® Cardiolipin                                                       | Sigma                                    | 810286C                                       |
| Egg PC                                                                      | Sigma                                    | 131601C                                       |
| Texas Red™ DHPE                                                             | Thermofischer                            | T1395MP                                       |
| HEPES                                                                       | Sigma-Aldrich                            | H3375-100G                                    |
| Potassium Acetate                                                           | Sigma-Aldrich                            | P1190-500G                                    |
| 6-Aminocaproic acid                                                         | Sigma-Aldrich                            | A7824-25G                                     |
| EDTA disodic                                                                | euromedex                                | EU0007-B                                      |
| Glycerol                                                                    | VWR                                      | 24388.295                                     |
| Invitrogen™ Novex™ NativePAGE™ 3-12%% Bis-Tris Protein Gels, 1.0mm, 10 well | Fisher Scientific                        | 10064012                                      |
| Digitonin                                                                   | Merck                                    | 300410-5GM                                    |
| D-(+)-Sucrose, ultrapure DNase RNase free                                   | VWR                                      | 0335-500g                                     |
| Tris-Base                                                                   | Euromedex                                | 200923-A                                      |
| EGTA                                                                        | Sigma-Aldrich                            | E3889-100G                                    |
| Potassium chloride                                                          | Alfa Aesar                               | 11595-A1                                      |
| Magnesium Chloride, HexaHydrate                                             | Euromedex                                | 2189-B                                        |
| KH2PO4 Potassium phosphate, monobasic, anhydrous                            | Euromedex                                | 2018-A                                        |
| Iodonitrotetrazolium                                                        | Sigma-Aldrich                            | I8377-1G                                      |
| Diaminobenzidine                                                            | Sigma-Aldrich                            | 32750-5G-F                                    |
| Cytochrome c from bovine heart                                              | Sigma-Aldrich                            | C2037-500MG                                   |
| <b>Critical Commercial Assays</b>                                           |                                          |                                               |
| ATP Bioluminescence Assay Kit CLS II                                        | Roche                                    | 11699695001                                   |
| Pierce BCA                                                                  | Thermo Fisher Scientific                 | 23225                                         |
| SuperSignal™ West Femto Maximum Sensitivity Substrate                       | Thermo Fisher Scientific                 | 34095                                         |
| Maxima First Strand cDNA Synthesis Kit for RT-qPCR                          | Thermo Fisher Scientific                 | K1641                                         |
| Maxima SYBR Green qPCR Master Mix (2X), with separate ROX vial              | Thermo Fisher Scientific                 | K0252                                         |
| Rat/Mouse Insulin ELISA                                                     | Millipore                                | EZRMI-13K                                     |
| <b>Deposited Data</b>                                                       |                                          |                                               |
| Raw and analyzed data                                                       | This paper                               | github.com/hchauvin/prola2019                 |
| Uniprot Mus Musculus database                                               | Uniprot                                  | uniprot.org                                   |
| GenBank sequence database                                                   | NIH                                      | ncbi.nlm.nih.gov/genbank/                     |
| <b>Experimental Models: Organisms/Strains</b>                               |                                          |                                               |
| Mouse: <i>Hacd1</i> -KO mice in the C57BL/6N genetic background             | Home-made                                | ncbi.nlm.nih.gov/pubmed/26160855              |
| <b>Oligonucleotides</b>                                                     |                                          |                                               |
| Primers, see Table S6                                                       | This paper                               | N/A                                           |
| <b>Software and Algorithms</b>                                              |                                          |                                               |
| ImageJ                                                                      | NIH                                      | fiji.sc                                       |
| SigmaStat 3.0                                                               | Systat Software                          | systatsoftware.com                            |
| GraphPad                                                                    | GraphPad Software                        | graphpad.com/company/                         |
| Algorithms for TMA-DPH decay analysis                                       | This paper                               | github.com/ProlaLab/Prola2020.Sci.Adv         |
| PANTHER Classification system                                               | GENEONTOLOGY                             | http://pantherdb.org/                         |
| XTandem Pipeline                                                            | The Global Proteome Machine Organization | http://pappso.inra.fr/bioinfo/xtandempipeline |

**Supplemental Listing S1 | Final non-linear mixed effects models of the fluorescence decay of TMA-DPH on mitoplasts and whole mitochondria.**  
Related to Figure S6. *(in the R statistical language).*

```
1 library(nlme)
2
3 # Shared coefficients between Hacd1-KO and WT
4 model_A <- nlme(
5   Decay ~ ...,
6   fixed = theta1 + B1 + theta2 + B2 + theta3 + B3 ~ 1,
7   random = list(
8     File = pdDiag(B1 + B2 + B3 + theta1 + theta2 + theta3 ~ 1)
9   ),
10  weights = varConstPower(fixed = c(power = 0.5), const = 1, form = ~ fitted(.))
11 )
12
13 # Only Bs (resolving to mixing proportions) allowed to be different
14 # in Hacd1-KO and WT populations
15 model_B1 <- update(
16   model_A,
17   fixed = list(
18     theta1 + theta2 + theta3 ~ 1,
19     B1 + B2 + B3 ~ Population
20   )
21 )
22
23 # Only thetas (resolving to characteristic times) allowed to be different
24 model_B2 <- update(
25   model_A,
26   fixed = list(
27     theta1 + theta2 + theta3 ~ Population,
28     B1 + B2 + B3 ~ 1
29   )
30 )
31
32 # All coefficients allowed to be different
33 model_C <- update(
34   model_A,
35   fixed = theta1 + B1 + theta2 + B2 + theta3 + B3 ~ Population
36 )
```

**Supplemental Table S1 | Anatomical parameters of WT and *Hacd1*-KO mice after normal or high-fat diet.** Related to Figures 1 and S1.

Anatomical parameters measured after 9 wk of normal (ND) or high-fat diet (HFD). BW: body weight; initial and final: before and after the 9-wk period of ND or HFD, respectively; BW gain: difference between final and initial body weight; HW: heart weight; TA: *tibialis anterior* mass; GWAT, RWAT and MWAT: gonadal, retroperitoneal and mesenteric white adipose tissue weight, respectively; BAT: brown adipose tissue weight. Results are represented as mean  $\pm$  s.e.m..  $n = 9$ . \* $P < 0.05$ ; \*\* $P < 0.01$ ; \*\*\* $P < 0.001$  versus respective WT values. \$ $P < 0.05$ ; \$\$ $P < 0.01$ ; \$\$\$ $P < 0.001$  versus respective ND values.

**Supplemental Table S2 | Echocardiographic parameters of WT and *Hacd1*-KO mice.** Related to Figures 2 and S2.

Cardiac function of mice fed with normal diet was analyzed by echocardiography. EF: Ejection Fraction; FS: Fractional shortening; HR: Heart rate; LVd, LVs: Left Ventricle diameter in diastole and systole, respectively; IVSd, IVSs: interventricular septum thickness in diastole and systole, respectively; PWd, PWs: posterior wall thickness in diastole and systole, respectively. Strain rate was measured in unit/s (ant.) and (post.). Results are represented as mean  $\pm$  s.e.m..  $n = 8$  per group.

**Supplemental Table S3 | Proteomic dataset and Panther analysis.** Related to Figure S2.

**Supplemental Table S4 | Mitochondrial respiration rates.** Related to Figures 3 and S3.

Complex activity and substrate utilization unit is  $\mu\text{molO}_2/\text{min/g}$  of dry mass of fibers or per g of protein for isolated mitochondria. Respiration rates in the presence of saturating pyruvate and ADP (Phosphorylating, State 3) and after complete ADP consumption (State 4). RCR: Respiratory Control Ratio. Respiration rates in the presence of oligomycin (Non-phosphorylating) and FCCP (Uncoupled). At the end of the experiment, cytochrome *c* was added to the medium (Cyt-C stimulation) to check that the stimulation of respiration did not exceed 10%, confirming the integrity of the outer mitochondrial membrane. Simultaneous measurement of respiration rates and ATP production in the presence of saturating pyruvate and ADP (State 3) for ATP/O determination. Values are given as mean  $\pm$  s.e.m.. Number in parentheses is the number of analyzed animals. Value for each animal was the mean of 1-3 independent analyses. For statistical analysis, unpaired t-test was used. ACR: Acceptor Control Ratio.

**Supplemental Table S5 | Non-linear mixed-effects models of the fluorescence decay of TMA-DPH.** Related to Figure S6.

Values are given as fixed effects  $\pm$  s.e for the variables defined in models A, B1, B2 and C (see *Materials and Methods*). More specifically,  $B_1$ ,  $B_2$  and  $B_3$  are scale coefficients for the three exponentials and  $\theta_1$ ,  $\theta_1$  and  $\theta_1$  are monotonous parametrizations of characteristic times. For models B1, B2 and C, the variables are

regressed against the mice phenotype (WT or *Hacd1*-KO). The contrast matrix for this regression is given in the *Materials and Methods*.  $P < 0.1$ ;  $*P < 0.05$ ;  $**P < 0.01$ ;  $***P < 0.001$ .

**Supplemental Table S6 | Sequence of qPCR primers used in this study.** Related to Materials and methods.

**Supplemental Table S7 | Key resources table.** Related to Materials and methods.

**Supplemental Listing S1 | Final non-linear mixed effects models of the fluorescence decay of TMA-DPH on mitoplasts and whole mitochondria.** Related to Figure S6.

Specifics, given in the *R statistical language* for the **nlme** library, of the non-linear mixed effects models A, B1, B2 and C.

All the code is made available at [github.com/ProlaLab/Prola2020.Sci.Adv](https://github.com/ProlaLab/Prola2020.Sci.Adv) with the appropriate tests and reproducible workflow (in addition, the releases are archived at DOI 10.5281/zenodo.1228112). The raw data is available upon request at DOI 10.5281/zenodo.4046133.

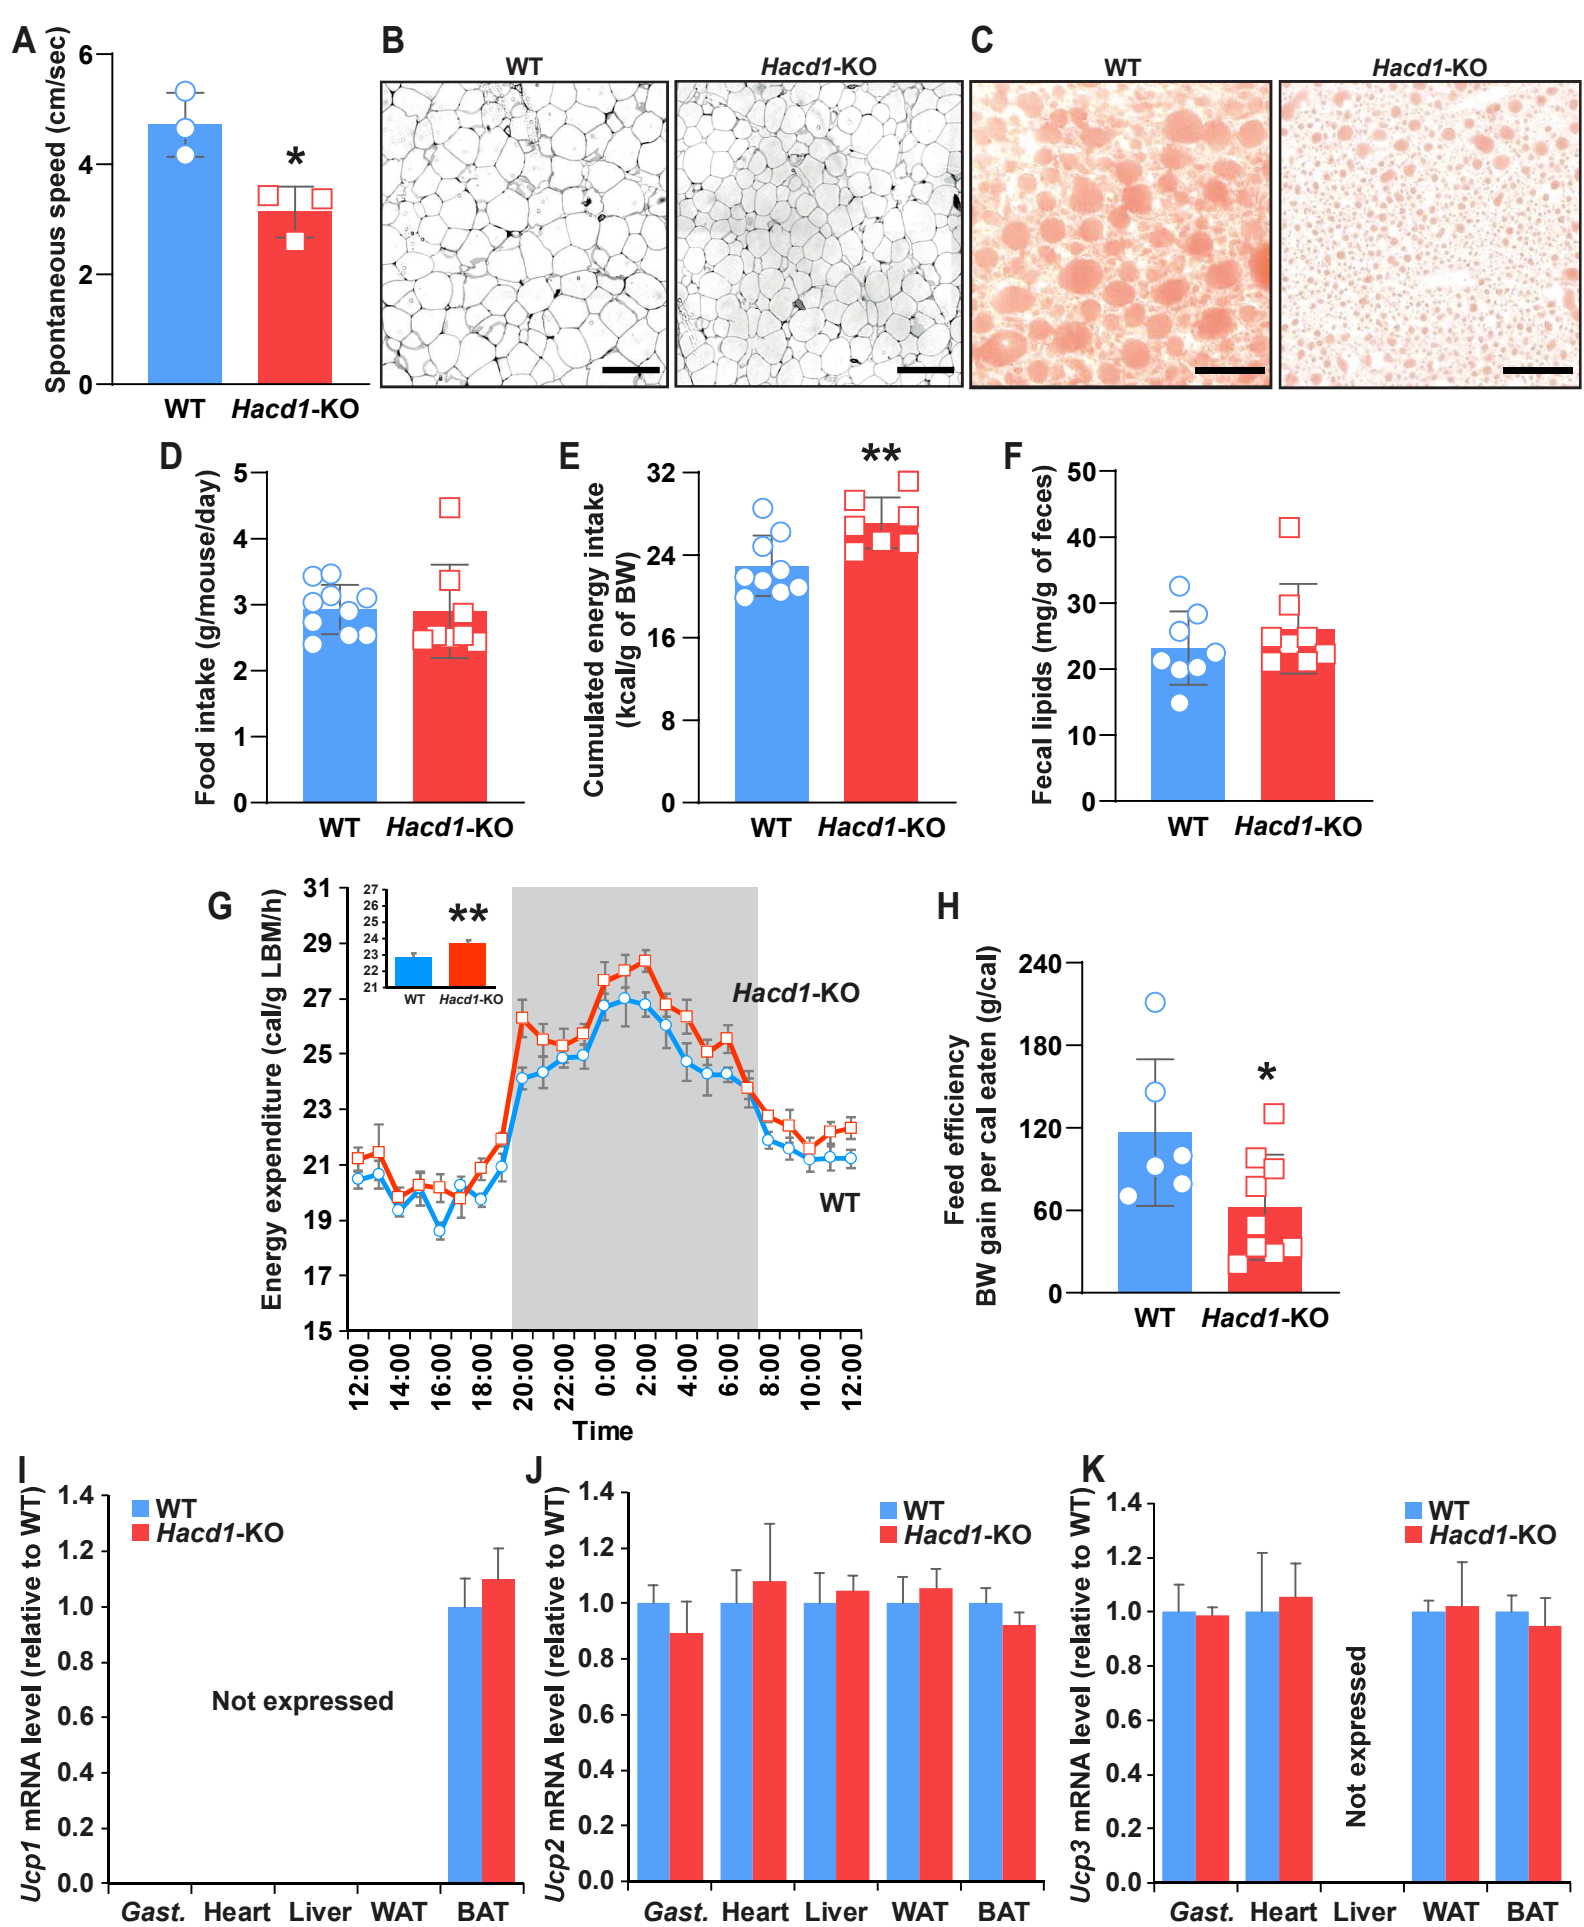

**Supplemental Figure 1 | Metabolic parameters associated with protection against high-fat diet-induced obesity in *Hacd1*-KO mice.** Related to Figure 1.

**(A)** Mean speed of spontaneous nocturnal locomotor activity. **(B)** Hematoxylin & Eosin-stained transverse sections of gonadal fat pads after 9 wk of high-fat diet (HFD), highlighting the contour of adipocytes. **(C)** Oil-Red-O-stained transverse sections of liver after 9 wk of HFD. **(D)** Mean daily food intake during the 9-wk period of HFD per mouse. **(E)** Cumulated energy intake during the 9-wk period of HFD. **(F)** Fecal lipid excretion after 8 wk of HFD. **(G)** Circadian energy expenditure measured by indirect calorimetry under normal diet (ND); the active period of night is shaded. Mean hourly energy expenditure during the assessment period is represented as histogram. **(H)** Feed efficiency during the 9-wk assessment period of ND. **(I-K)** *Ucp1* **(I)**, *Ucp2* **(J)** and *Ucp3* **(K)** mRNA expression normalized by geometrical mean of three independent reference genes in superficial *gastrocnemius* muscle (*Gast.*), heart, liver, gonadal white adipose tissue (WAT) and brown adipose tissue (BAT) of *Hacd1*-KO mice, compared to WT mice set to 1.0. Scale bars represent 50  $\mu\text{m}$  in **B** and **C**. Error bars,  $\pm$  s.e.; \* $P < 0.05$  and \*\* $P < 0.01$  versus respective WT values.

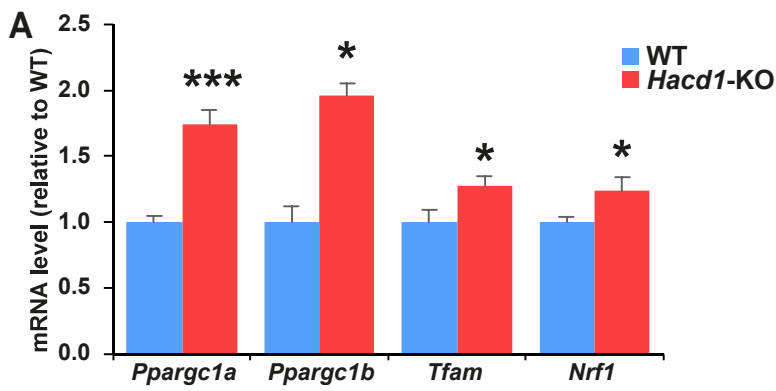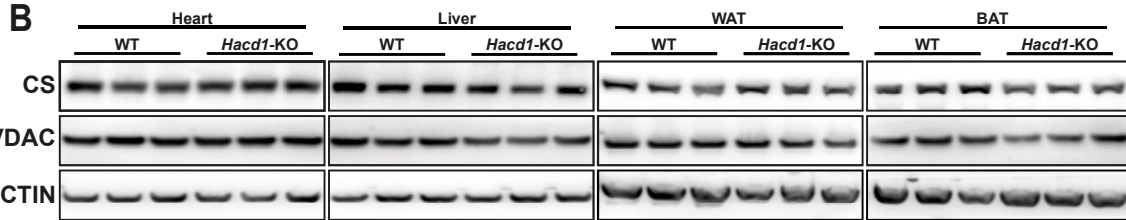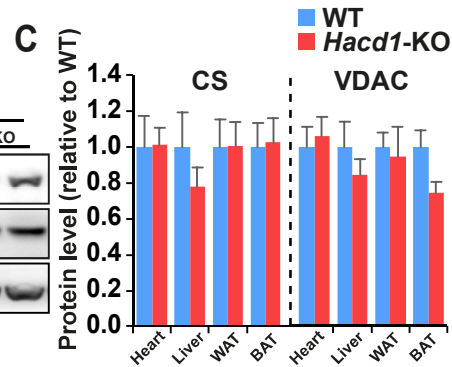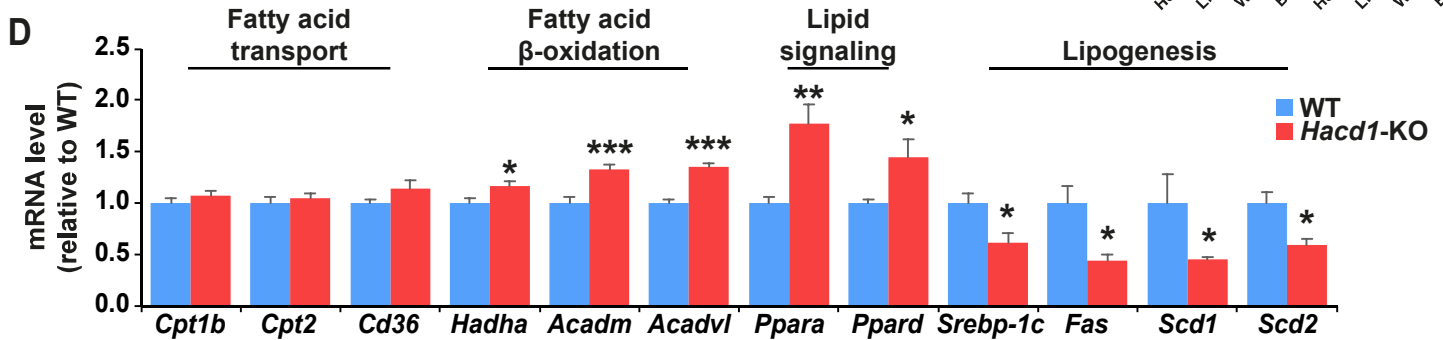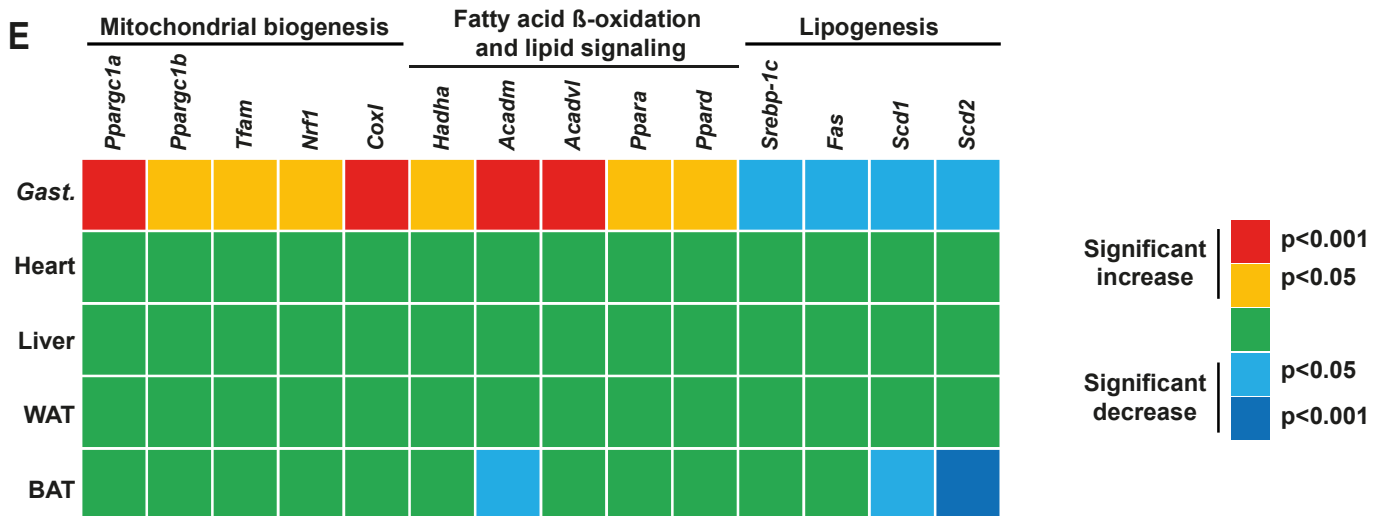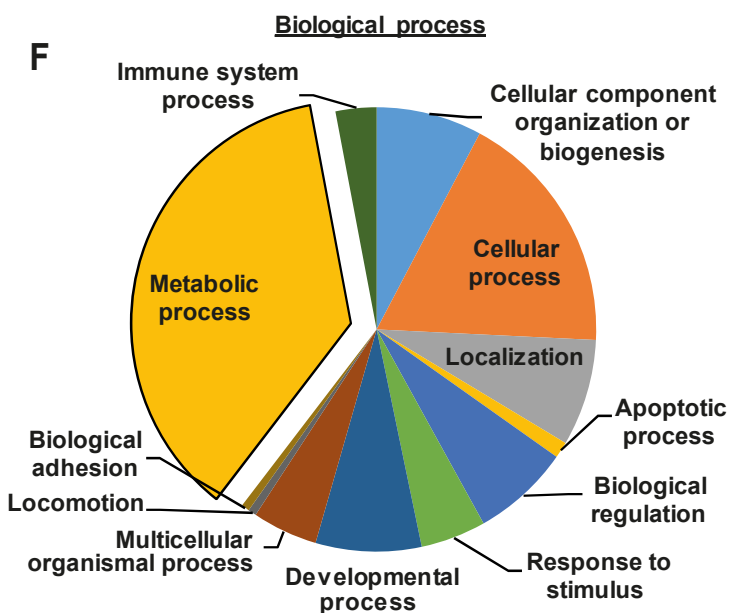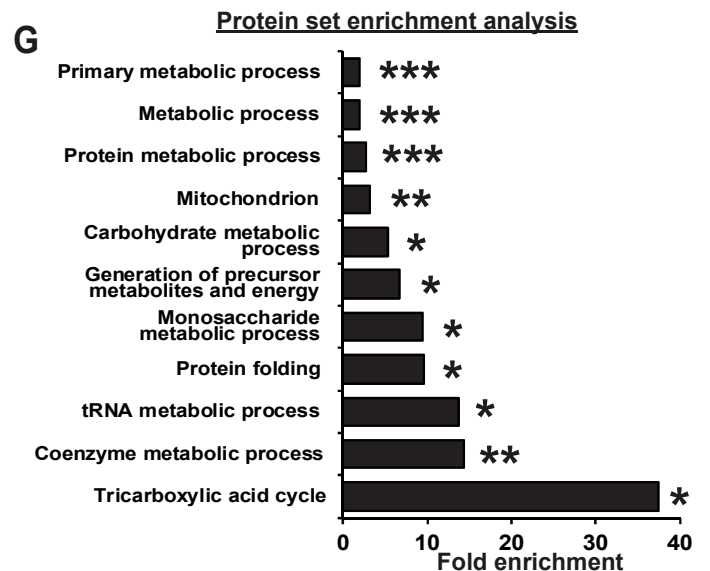



**Supplemental Figure 2 | Metabolic changes of *Hacd1*-KO mice are restricted to skeletal muscle.** Related to Figure 2.

**(A)** *Ppargc1a*, *Ppargc1b*, *Tfam* and *Nrf1* mRNA expression normalized by the geometrical mean of three independent reference genes in superficial *gastrocnemius* muscle. **(B-C)** Representative immunoblots **(B)** and quantification **(C)** of CS and VDAC, normalized to the expression of  $\beta$ -Actin in heart, liver, white adipose tissue (WAT) and brown adipose tissue (BAT). **(D)** mRNA expression in superficial *gastrocnemius* muscle of a panel of genes involved in lipid metabolism, normalized by the geometrical mean of three independent reference genes. **(E)** mRNA expression of a panel of genes involved in mitochondrial biogenesis, lipid oxidation and lipogenesis, normalized by geometrical mean of three independent reference genes, in superficial *gastrocnemius* muscle (*Gast.*), heart, liver, gonadal white adipose tissue (WAT) and brown adipose tissue (BAT). **(F and G)** Gene ontology analysis and PANTHER protein set statistical enrichment analysis performed on the panel of the 96 proteins that are upregulated in the *tibialis anterior* muscle of *Hacd1*-KO mice, compared to WT mice. Error bars,  $\pm$  s.e.; \* $P < 0.05$ , \*\* $P < 0.01$  and \*\*\* $P < 0.001$  versus respective WT values.

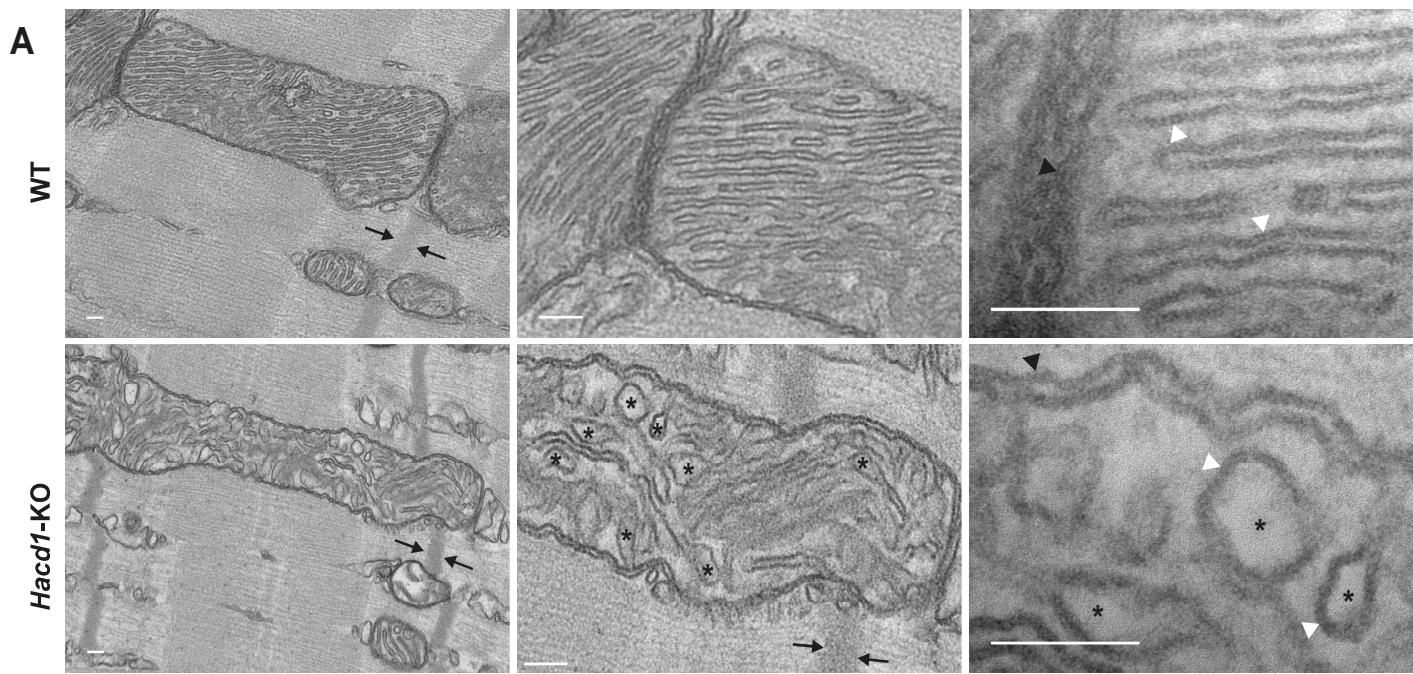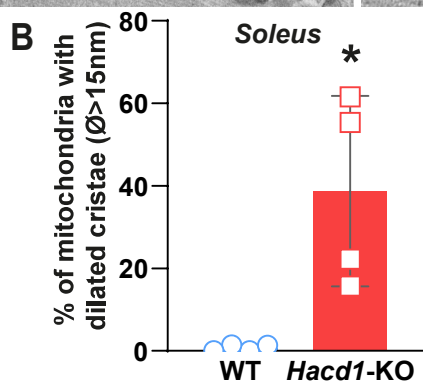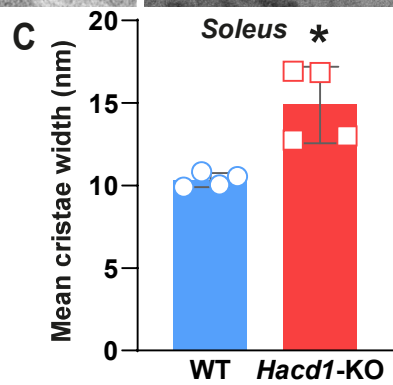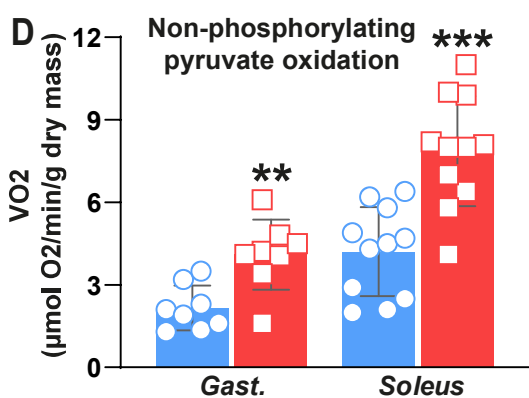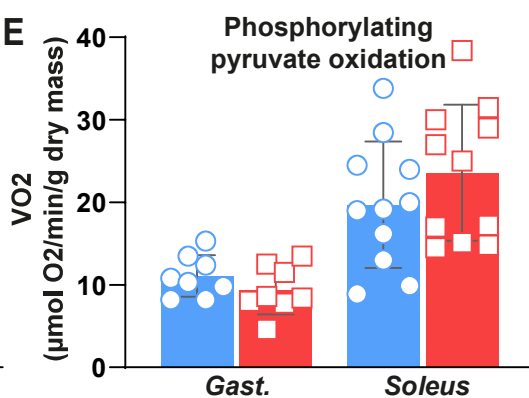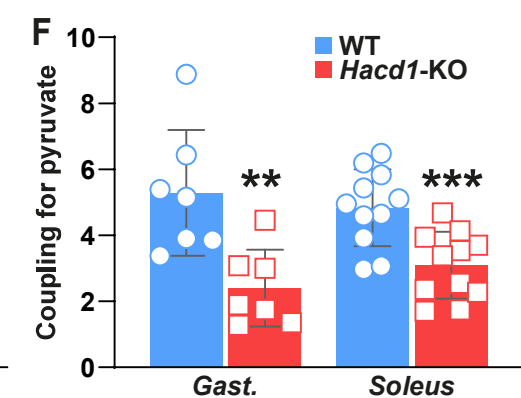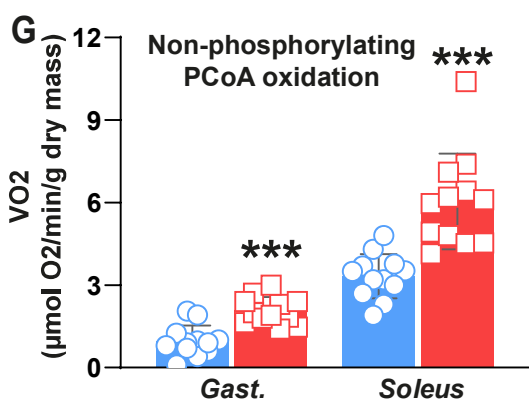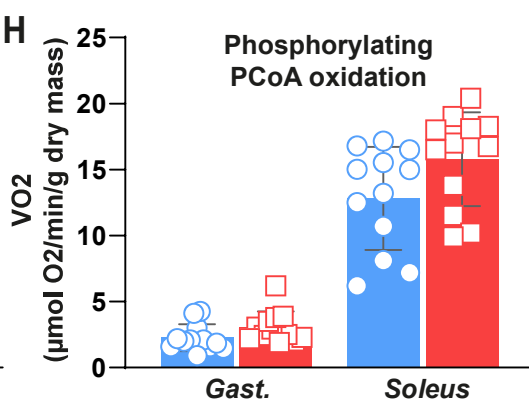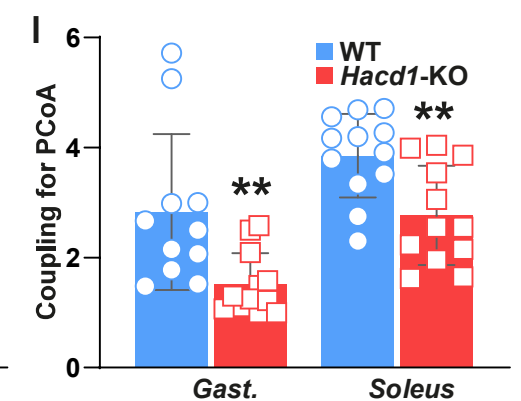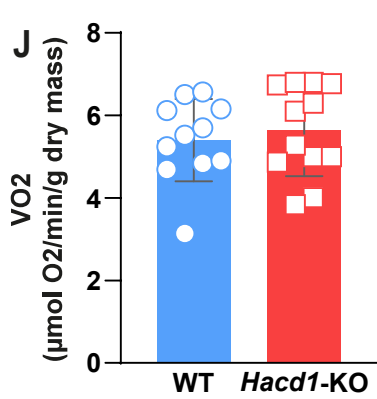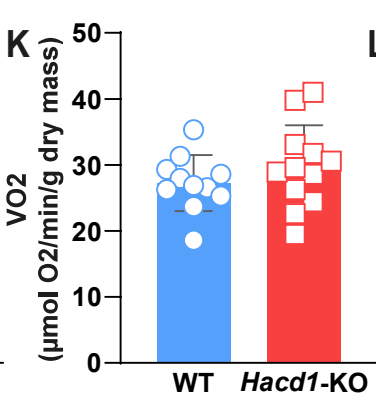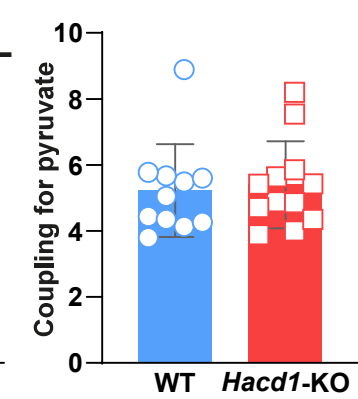

**Supplemental Figure 3 | Remodeled structure and modified respiratory parameters of skeletal muscle fibers of *Hacd1*-KO mice.** Related to Figure 3.

**(A)** Transmission electron microscopy of longitudinal sections of myofibers from *soleus* muscle. Images are from datasets taken at a low (x 2,500; left panel), intermediate (x 10,000; middle panel) and high (x 30,000; right panel) magnification. The Z-line is delimited by arrows. Cristae are regular tubular-shaped invaginations (white arrow heads) of the inner mitochondrial membrane, unambiguously identified on the same plane than the outer mitochondrial membrane (black arrow heads). Excessive dilation of cristae tips (asterisk) is frequently observed in *Hacd1*-KO myofibers. **(B and C)** Morphometric quantification in *soleus* muscle of the percentage of mitochondria containing cristae with excessively dilated tips (maximal diameter >15 nm) **(B)** and the mean maximal diameter of the tubular segment of cristae **(C)**. **(D and E)** Non-phosphorylating **(D)** and phosphorylating **(E)** oxidation rate in the presence of pyruvate in permeabilized myofibers freshly isolated from superficial *gastrocnemius* (*Gast.*) and *soleus* muscles. **(F)** Mitochondrial coupling for pyruvate (Acceptor Control Ratio (ACR) of phosphorylating to non-phosphorylating oxidation rates of pyruvate from **D** and **E**). **(G and H)** Non-phosphorylating **(G)** and phosphorylating **(H)** oxidation rate in the presence of Palmitoyl-Coenzyme A (PCoA) in permeabilized myofibers freshly isolated from superficial *gastrocnemius* (*Gast.*) and *soleus* muscles. **(I)** Mitochondrial coupling for PCoA (ACR of phosphorylating to non-phosphorylating oxidation rates of PCoA from **G** and **H**). **(J and K)** Non-phosphorylating **(J)** and phosphorylating **(K)** respiration rates of saponin-permeabilized cardiac fibers in the presence of pyruvate. **(L)** Mitochondrial coupling of saponin-permeabilized cardiac fibers in the presence of pyruvate (ACR of phosphorylating to non-phosphorylating oxidation rates of pyruvate

from **J** and **K**). Scale bars in **A**: 100 nm. Error bars,  $\pm$  s.e.; \* $P < 0.05$ , \*\* $P < 0.01$  and \*\*\* $P < 0.001$  versus respective WT values.

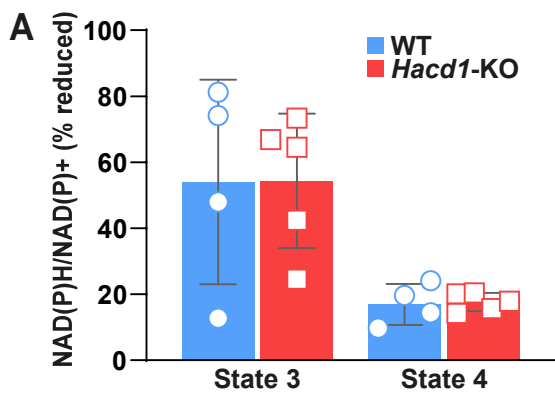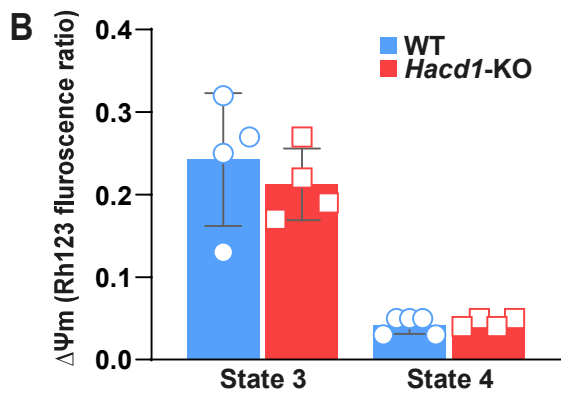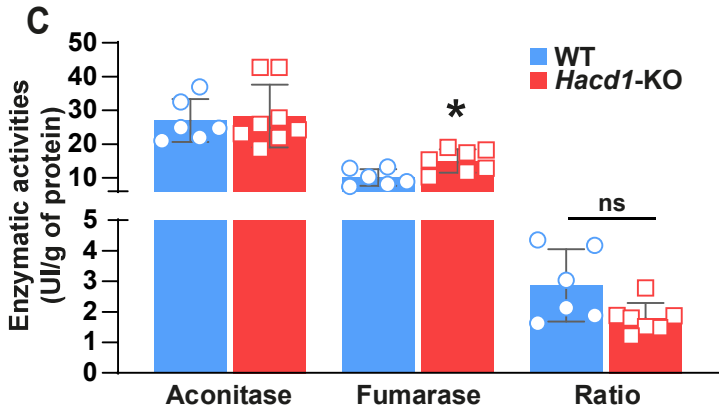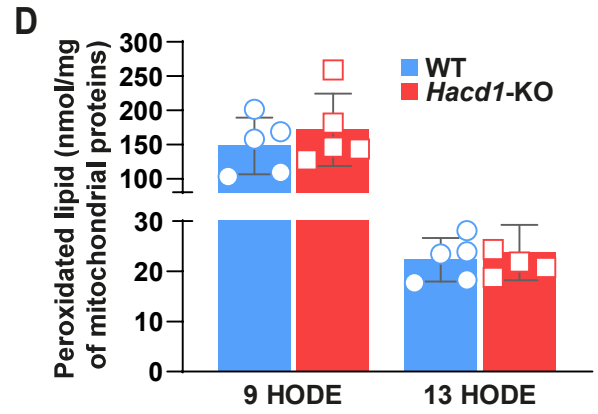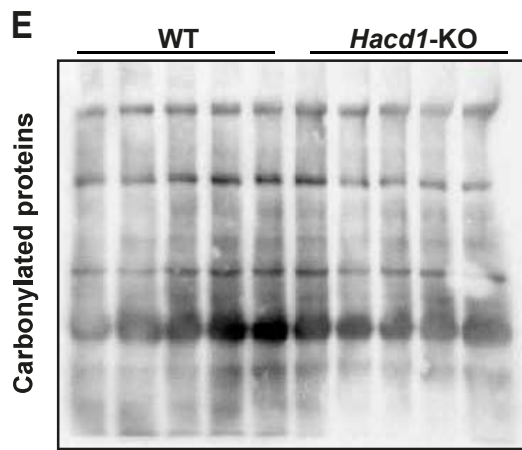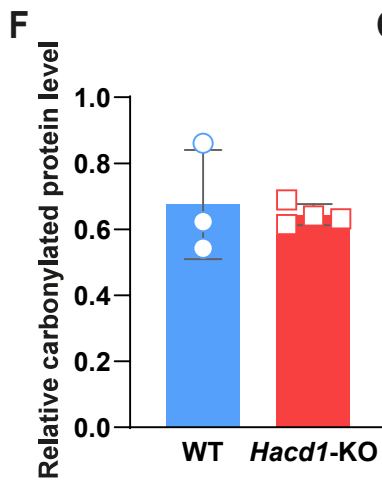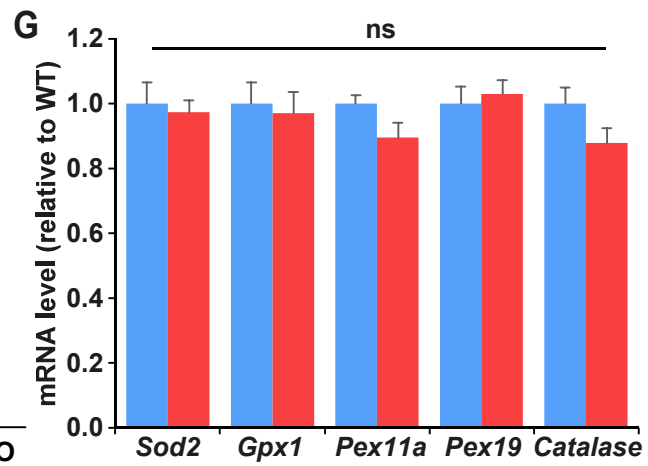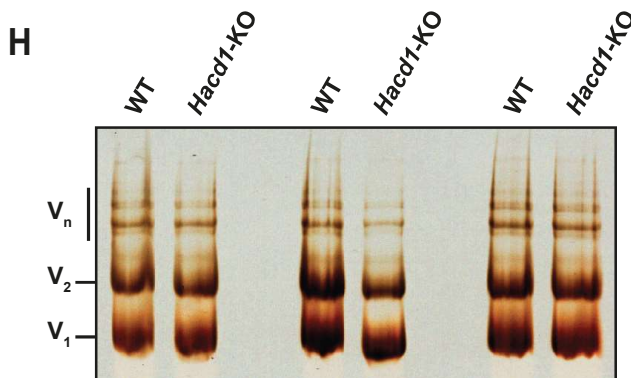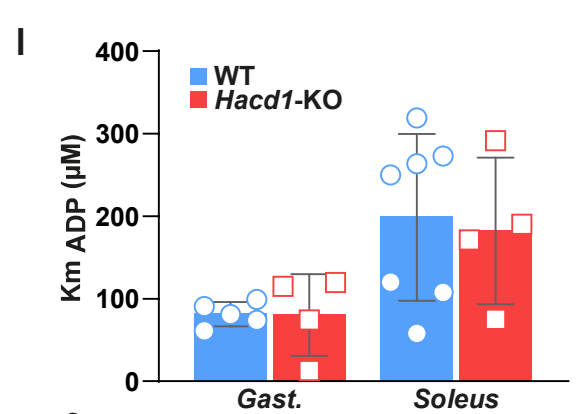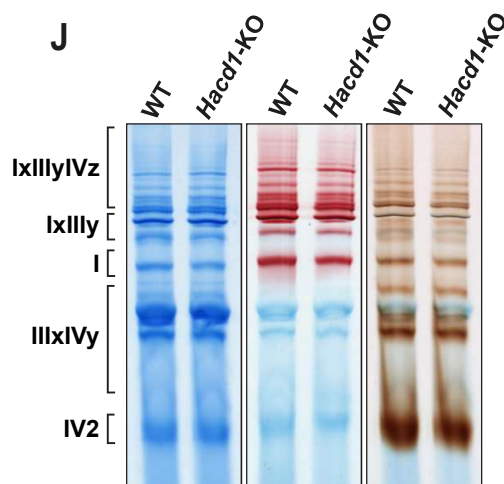

**Supplemental Figure 4 | Reduced mitochondrial coupling in muscle of *Hacd1*-KO mice is not associated with respiratory chain or ATP synthase dysfunction, nor oxidative stress.** Related to Figure 3.

**(A)** NAD(P)H/NAD(P)<sup>+</sup> ratio measured on isolated mitochondria from *tibialis anterior* muscle of WT and *Hacd1*-KO mice in state 4 (no ADP) and state 3 (2 mM ADP). **(B)**  $\Delta\psi_m$  measured on isolated mitochondria from *tibialis anterior* muscle of WT and *Hacd1*-KO mice in state 4 (no ADP) and state 3 (2 mM ADP). **(C)** Aconitase and fumarase enzymatic activities and ratio of aconitase to fumarase activity in isolated mitochondria from *tibialis anterior* muscle. **(D)** 9-hydroxyoctadecadienoic acid (9-HODE) and 13-hydroxyoctadecadienoic acid (13-HODE) quantification in isolated mitochondria from *tibialis anterior* muscle. **(E and F)** Quantitative blotting of protein carbonylation in superficial *gastrocnemius* muscle. **(G)** *Sod2*, *Gpx1*, *Pex11a*, *Pex19* and *Catalase* mRNA expression normalized by geometrical mean of three independent reference genes in superficial *gastrocnemius* muscle. **(H)** In-gel activity of mitochondrial ATP synthase complexes isolated from the *tibialis anterior* muscle. **(I)** Apparent  $K_m$  of oxygen consumption for ADP on permeabilized fibers from superficial *gastrocnemius* (*Gast.*) and *soleus* muscles. **(J)** Analysis of the supramolecular organization of mitochondrial respiratory chain complexes in WT and *Hacd1*-KO mice. Mitochondria from the *tibialis anterior* muscle were analyzed by BN-PAGE, followed by Coomassie Brilliant Blue staining or In-gel enzyme activities (IGA) for complexes I or IV. The positions of respiratory chain complexes and supercomplexes are indicated to the left. (Representative image from three independent experiments.) Error bars,  $\pm$  s.e.; \* $P < 0.05$  versus respective WT values.

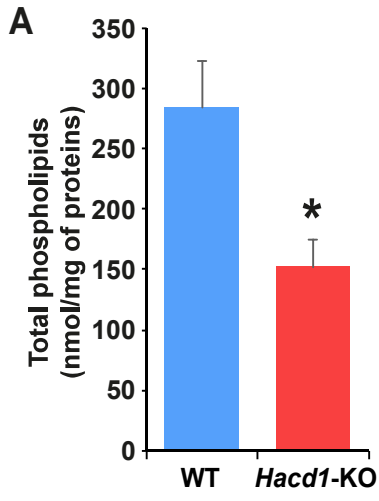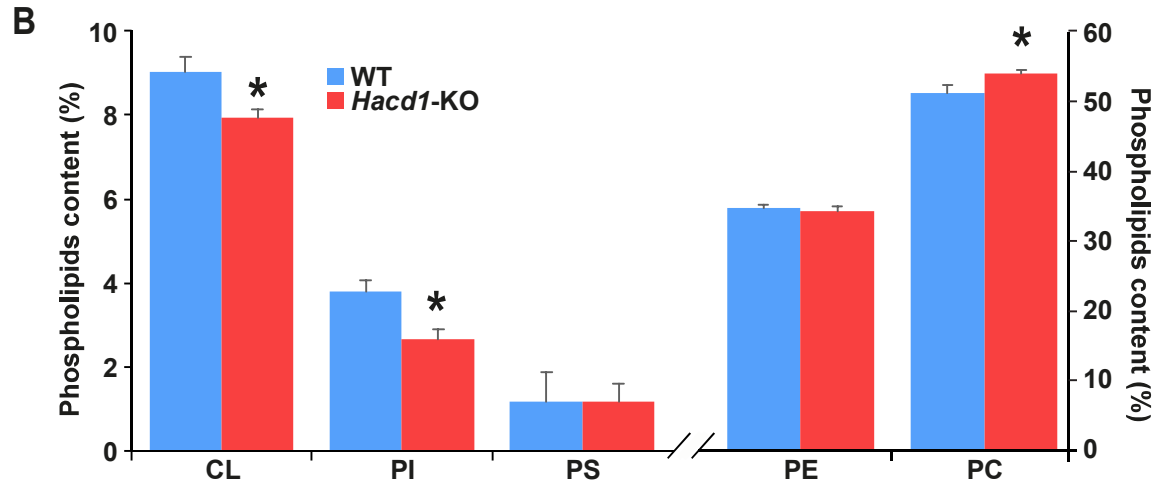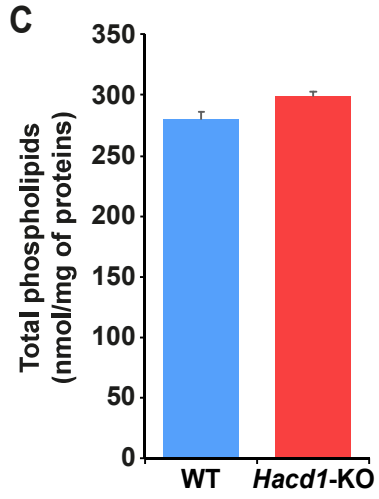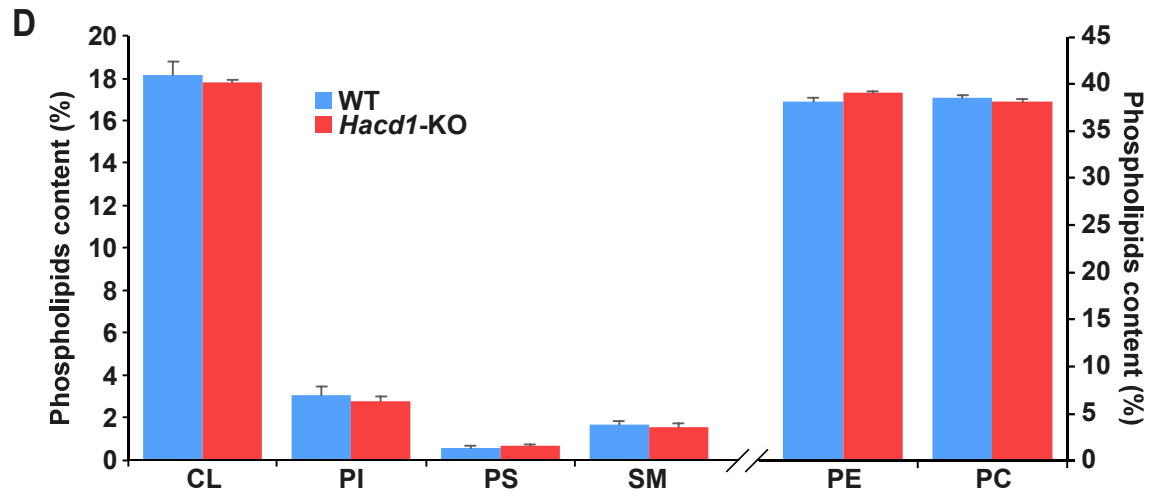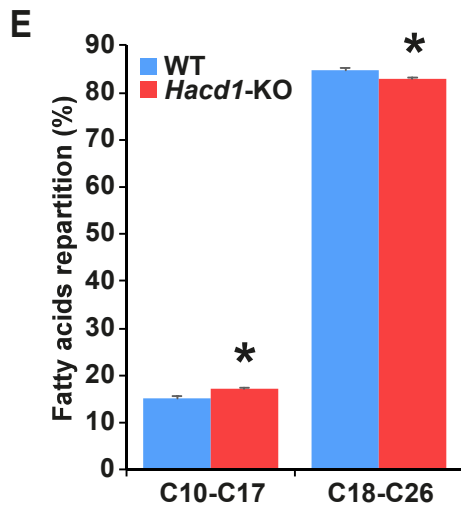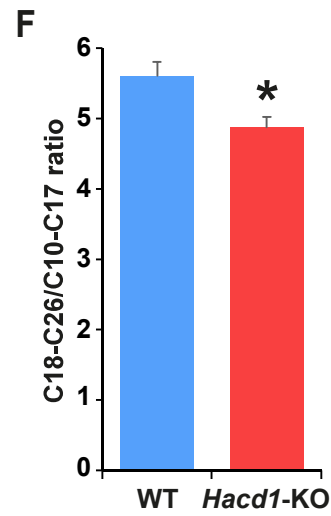

**Supplemental Figure 5 | Phospholipid and fatty acid quantification in mitochondria from *Hacd1*-KO mice.** Related to Figure 4.

**(A)** Total phospholipid content of mitochondria isolated from the *tibialis anterior* muscle, normalized to the mitochondrial protein content. **(B)** Relative phospholipid species content of mitochondria isolated from the *tibialis anterior* muscle, normalized to the total content of mitochondrial phospholipids. **(C)** Total phospholipid content of mitochondria isolated from the heart, normalized to the mitochondrial protein content. **(D)** Relative phospholipid species content of mitochondria isolated from the heart, normalized to the total content of mitochondrial phospholipids. **(E and F)** Fatty acids repartition **(E)** and ratio of C18-26 to C10-17 **(F)** from total lipids of mitochondria isolated from the *tibialis anterior* muscle. CL = cardiolipins, PC = phosphatidylcholine, PE = phosphatidylethanolamine, PI = phosphatidylinositol, PS = phosphatidylserine, SM = sphingomyeline.

error bars,  $\pm$  s.e.; \* $P < 0.05$  and \*\* $P < 0.01$  versus respective WT values.



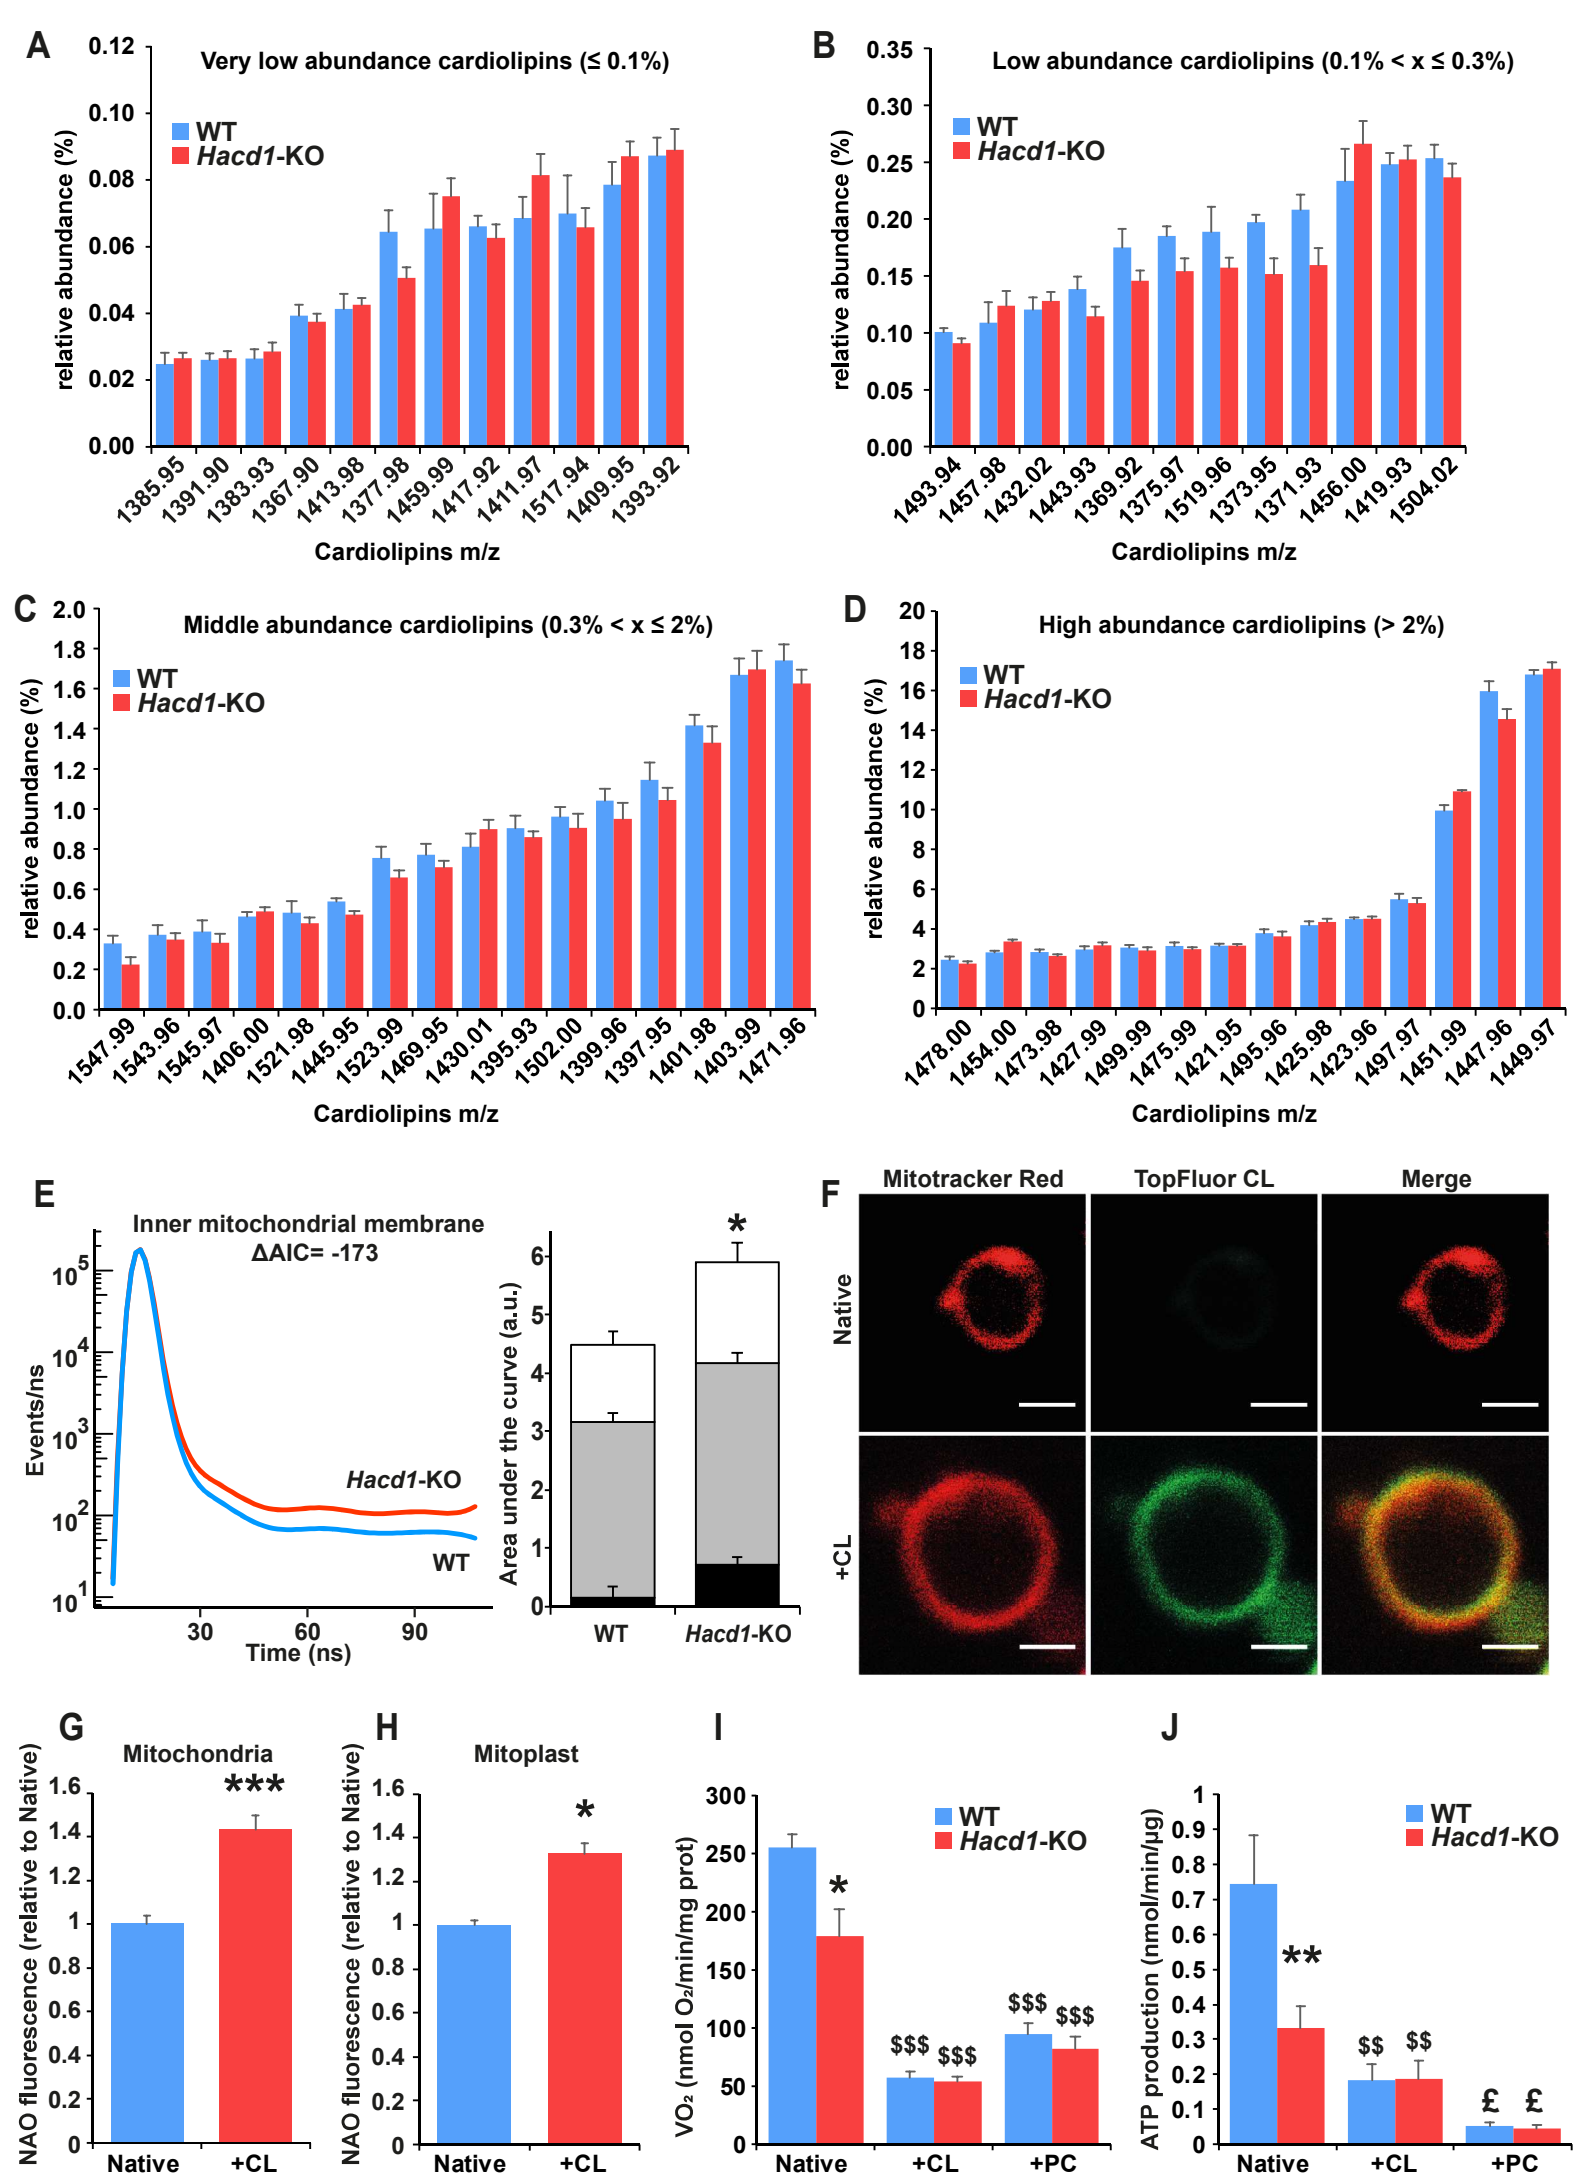

**Supplemental Figure 6 | Cardiolipin enrichment in mitochondria from *Hacd1*-KO mice.** Related to Figure 4.

**(A-D)** Relative cardiolipins composition of mitochondria isolated from tibialis anterior muscle of *Hacd1*-KO mice, compared to WT mice. Each cardiolipin species is expressed as a percentage of total cardiolipin content and separated as very low (<0.1%, **A**), low ( $0.1\% < x \leq 0.3\%$ , **B**), middle ( $0.3\% < x \leq 2\%$ , **C**) and high (>2%, **D**) abundance. **(E)** TMA-DPH lifetime decay (curves) and mixing proportions (histograms) in the inner mitochondrial membrane, measured on mitoplasts from the *tibialis anterior* muscle. **(F)** Representative images of mitoplasts made from native mitochondria or after fusion of mitochondria with TopFluor-Cardiolipin (CL) vesicles and stained with Mitotracker Red. Scale bar: 1 $\mu$ m. **(G and H)** Quantification of cardiolipin enrichment with Nonyl-Acridine Orange (NAO) staining on native mitochondria and after fusion with CL vesicles (**G**) and on mitoplasts isolated from the corresponding mitochondria (**H**). **(I and J)** Oxidation rate (**I**) and ATP production (**J**) measured on native isolated mitochondria from *tibialis anterior* muscle or after fusion with cardiolipin (+CL) or phosphatidylcholine (+PC) vesicles. n = 5 per group for **A-D**; error bars:  $\pm$  s.e.m.; multiple pair wise tests using Holm-Bonferroni method revealed no significant differences.  $\Delta$ AIC = difference in the Akaike's Information Criterion (full analysis in Tables S5); error bars,  $\pm$  s.e.; \* $P < 0.05$  and \*\* $P < 0.01$  versus respective WT values; \$\$ =  $P \leq 0.01$  vs Native, \$\$\$ =  $P \leq 0.001$  vs Native, £ =  $P \leq 0.05$  vs +CL.
